# Supplementary material for: Epidemiology and Evolution of Emerging Porcine Circovirus-like Viruses in Pigs with Hemorrhagic Dysentery and Diarrhea Symptoms in Central China from 2018 to 2021
Source: MDPI journal article supplement (doi:10.3390/v13112282), 2021-11-15
Supplement: s1 [file s1]

**Supplementary file Figure S1.** Pregnant sows developed diarrhea and hemorrhagic enteritis.

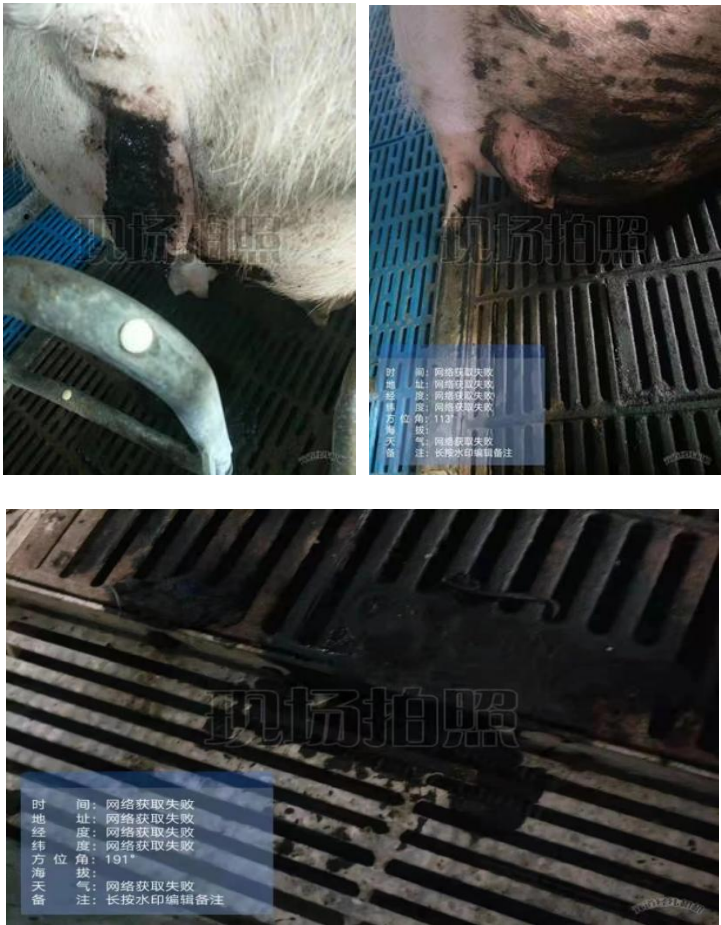

**Supplementary file Table S1** Primer sequences for detection and amplification of the whole genome of PCLV .

| Isolated strain | Primer name | Primer Sequence (5' to 3')    | Size(bp) | Purpose           |
|-----------------|-------------|-------------------------------|----------|-------------------|
| AH-23           | PCLV-D-F    | TGCTGAGACTAAGGGAGG            | 439      | Detection         |
|                 | PCLV-D-R    | ACTGGGTAAACGTAATGGA           |          |                   |
|                 | PCLV-1-F    | GGTTCCTATTATGGTCCGATTTTGTGG   | 1102     | Genome sequencing |
|                 | PCLV-1-R    | CTCCTTGTGCATCTGGGTATTGCTTGTC  |          |                   |
| AH-25           | PCLV-2-F    | GACAAGCAATACCCAGATGCACAAGGAG  | 2853     | Genome sequencing |
|                 | PCLV-2-R    | CCACAAAAATCGGACCATAATAGGAACC  |          |                   |
|                 | PCLV-3-F    | ATGCCTGGCACCTTAGACCCCTTTA     | 916      | Genome sequencing |
|                 | PCLV-3-R    | AATGAACTGACCACTCATGAA         |          |                   |
| AH-HB-2021      | PCLV-4-F    | TTCATGAGTGGTCAGTTCATT         | 3030     | Genome sequencing |
|                 | PCLV-4-R    | TAAAGGGGTCTAAGGTGCCAGGCAT     |          |                   |
|                 | PCLV-5-F    | TAGGGATTTCGCTTGGATCAAGTACT    | 1370     | Genome sequencing |
|                 | PCLV-5-R    | TATTACCTTTAGCGGAATCAAAATCGGAC |          |                   |
|                 | PCLV-6-F    | GTCCGATTTTGATTCCGCTAAAGGTAATA | 2462     | Genome sequencing |
|                 | PCLV-6-R    | AGTACTTGATCCAAGCGGAAATCCCTA   |          |                   |

**Supplementary file Table S2** The primers for porcine virus detection without commercial kits

| <b>Virus</b> | <b>Primer</b> | <b>Sequence</b>          | <b>Product size<br/>(bp)</b> |
|--------------|---------------|--------------------------|------------------------------|
| PBuVs        | PBuVs-F       | GGGCGAAGTTATTATCGTAT     | 102                          |
|              | PBuVs-R       | AATCTGGGTCCTCTGTCTGTCT   |                              |
| PKoV         | PKoV-F        | GGTCTTTGGCTACCTTCTTGTTTC | 342                          |
|              | PKoV-R        | GTTTGTGGGTCAGTCTTCGCTT   |                              |
| PDCoV        | PDCoV-F       | ATGCTCAAATCAACGAAACAC    | 265                          |
|              | PDCoV-R       | TCACCACTATCATCCTCACCC    |                              |
| PAstV        | PAstV-F       | ACCACCGCGCAGGA           | 573                          |
|              | PAstV-R       | TGTTGYTCAAGRGCAG         |                              |
| PSaV         | PSaV-F        | CGCTTTCCAATCATCACTCCAGG  | 177                          |
|              | PSaV-R        | GGTGTTGTCACGGGTGTTTCAGGT |                              |

**Supplementary file Table S3** The reference strains information used in this study

| Strains  | Collection date | Origin | Nucleotide(nt) | Genbank<br>accession No. | Host   | Organism            |
|----------|-----------------|--------|----------------|--------------------------|--------|---------------------|
| HB-2021  | 2021            | China  | 3832           | MZ960935                 | Pig    | Po-Circo-like virus |
| AH-23    | 2021            | China  | 3955           | MZ773067                 | Pig    | Po-Circo-like virus |
| AH-25    | 2021            | China  | 3946           | MZ773068                 | Pig    | Po-Circo-like virus |
| PCLV-21  | 2011            | U.S.A  | 3912           | JF713716.1               | Pig    | Po-Circo-like virus |
| PCLV-22  | 2011            | U.S.A  | 3923           | JF713717.1               | Pig    | Po-Circo-like virus |
| GX14     | 2019            | China  | 3944           | MN263296.1               | Pig    | Po-Circo-like virus |
| GX15     | 2019            | China  | 3944           | MN263298.1               | Pig    | Po-Circo-like virus |
| GX19     | 2019            | China  | 3944           | MN263297.1               | Pig    | Po-Circo-like virus |
| CSW10    | 2021            | China  | 3950           | MW881208.1               | Pig    | Po-Circo-like virus |
| CZQ11    | 2021            | China  | 3946           | MW881209.1               | Pig    | Po-Circo-like virus |
| CZH12    | 2021            | China  | 3954           | MW881210.1               | Pig    | Po-Circo-like virus |
| CQY09    | 2020            | China  | 3924           | MW881206.1               | Pig    | Circoviridae sp.    |
| CMM06    | 2020            | China  | 3943           | MW881205.1               | Pig    | Circoviridae sp.    |
| CHZ09    | 2020            | China  | 3943           | MW881207.1               | Pig    | Circoviridae sp.    |
| CH       | 2016            | China  | 3909           | MH316857.1               | Bovine | Bo-Circo-like virus |
| GX01_C4  | 2017            | China  | 921            | MK377537.1               | Pig    | Circovirus sp.      |
| GZ04_C4  | 2017            | China  | 831            | MK377589.1               | Pig    | Circovirus sp.      |
| HLJ01_C7 | 2017            | China  | 906            | MK377620.1               | Pig    | Circovirus sp.      |
| GX05_C2  | 2017            | China  | 921            | MK377556.1               | Pig    | Circovirus sp.      |
| NM02_C1  | 2017            | China  | 985            | MK377669.1               | Pig    | Circovirus sp.      |
| HuN02_C8 | 2017            | China  | 900            | MK377637.1               | Pig    | Circovirus sp.      |
| NM02_C3  | 2017            | China  | 906            | MK377671.1               | Pig    | Circovirus sp.      |
| YN02_C6  | 2017            | China  | 897            | MK377723.1               | Pig    | Circovirus sp.      |
| NX01_C5  | 2017            | China  | 900            | MK377676.1               | Pig    | Circovirus sp.      |
| YN01_C2  | 2017            | China  | 921            | MK377711.1               | Pig    | Circovirus sp.      |

**Supplementary file Table S4 The results of B-cell epitope prediction**

| Strains    | Location  | Eptitope residue     | Score |
|------------|-----------|----------------------|-------|
| AH-23      | 137-156   | PKFYMYHQALYRQFRHEALV | 1     |
|            | 198-217   | AYNKWWNGFVQEDTKRVVID | 0.848 |
|            | 110-129   | CKDKDEEARELIADMRLNE  | 0.786 |
|            | 25 - 44   | RNLEINPEVDAVIAEEEHLE | 1     |
|            | 72 - 91   | NAHIEVAMGSELDNIKYCTK | 0.825 |
| AH-25      | 137 - 156 | PKFYMMHQALYRQFRHEALV | 0.662 |
|            | 287 - 306 | FIFWRDKPLLALTLYPQMI  | 0.589 |
|            | 198 - 217 | AYNKWWNGFVQEDTKRVVID | 0.567 |
|            | 40 - 59   | EEHLEEGTPHIQGYLRLKTK | 1     |
| AH-HB-2021 | 120 - 139 | LIADMRLNESEFEAKYPKF  | 0.778 |
|            | 198 - 217 | AYNKWWNGFVQEDTKRVVID | 0.511 |
